# Supplementary material for: Improvement of a Surfactant Blend for Enhanced Oil Recovery in Carbonate Reservoirs by Means of an Ionic Liquid
Source: MDPI journal article supplement (doi:10.3390/ijms24010726), 2022-12-31
Supplement: s1 [file s1]

# Improvement of a Surfactant Blend for Enhanced Oil Recovery in Carbonate Reservoirs by Means of an Ionic Liquid

Nestor Tafur <sup>1</sup>, Alberto P. Muñuzuri <sup>2</sup> and Ana Soto <sup>1,\*</sup>

<sup>1</sup> CRETUS, Department of Chemical Engineering, Universidade de Santiago de Compostela, 15782 Santiago de Compostela, Spain

<sup>2</sup> Group of Nonlinear Physics, Galician Center for Mathematical Research and Technology (CITMaga), 15782 Santiago de Compostela, Spain

\* Correspondence: ana.soto@usc.es

## AOT/[C<sub>12</sub>mim]Br/LF2 blend scan

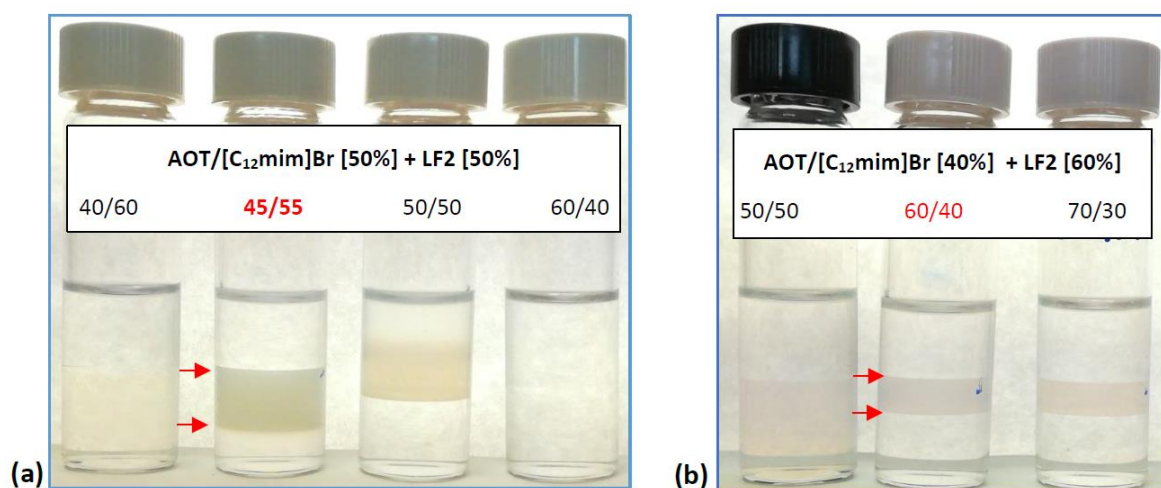

**Figure S1.** AOT/[C<sub>12</sub>mim]Br + LF2 blend scan as a function of AOT/[C<sub>12</sub>mim]Br ratio. (a) AOT/[C<sub>12</sub>mim]Br [50%] + LF2 [50%]. (b) AOT/[C<sub>12</sub>mim]Br [40%] + LF2 [60%]. Test temperature 25°C. N-octane as oil phase.
